# Supplementary material
Source: publisher site journal article supplement (https://www.dovepress.com/article/309846)
Supplement: Supplementary file 1 [file get_supplementary_file.php]

**Supplementary Materials**

**Supplementary Figure1:** Gene ontology **(A)** and KEGG **(B)** analysis of 104 ferroptosis-related genes. Eight potentially prognostic ferroptosis-associated genes were used to construct another PPI network **(C).**

**
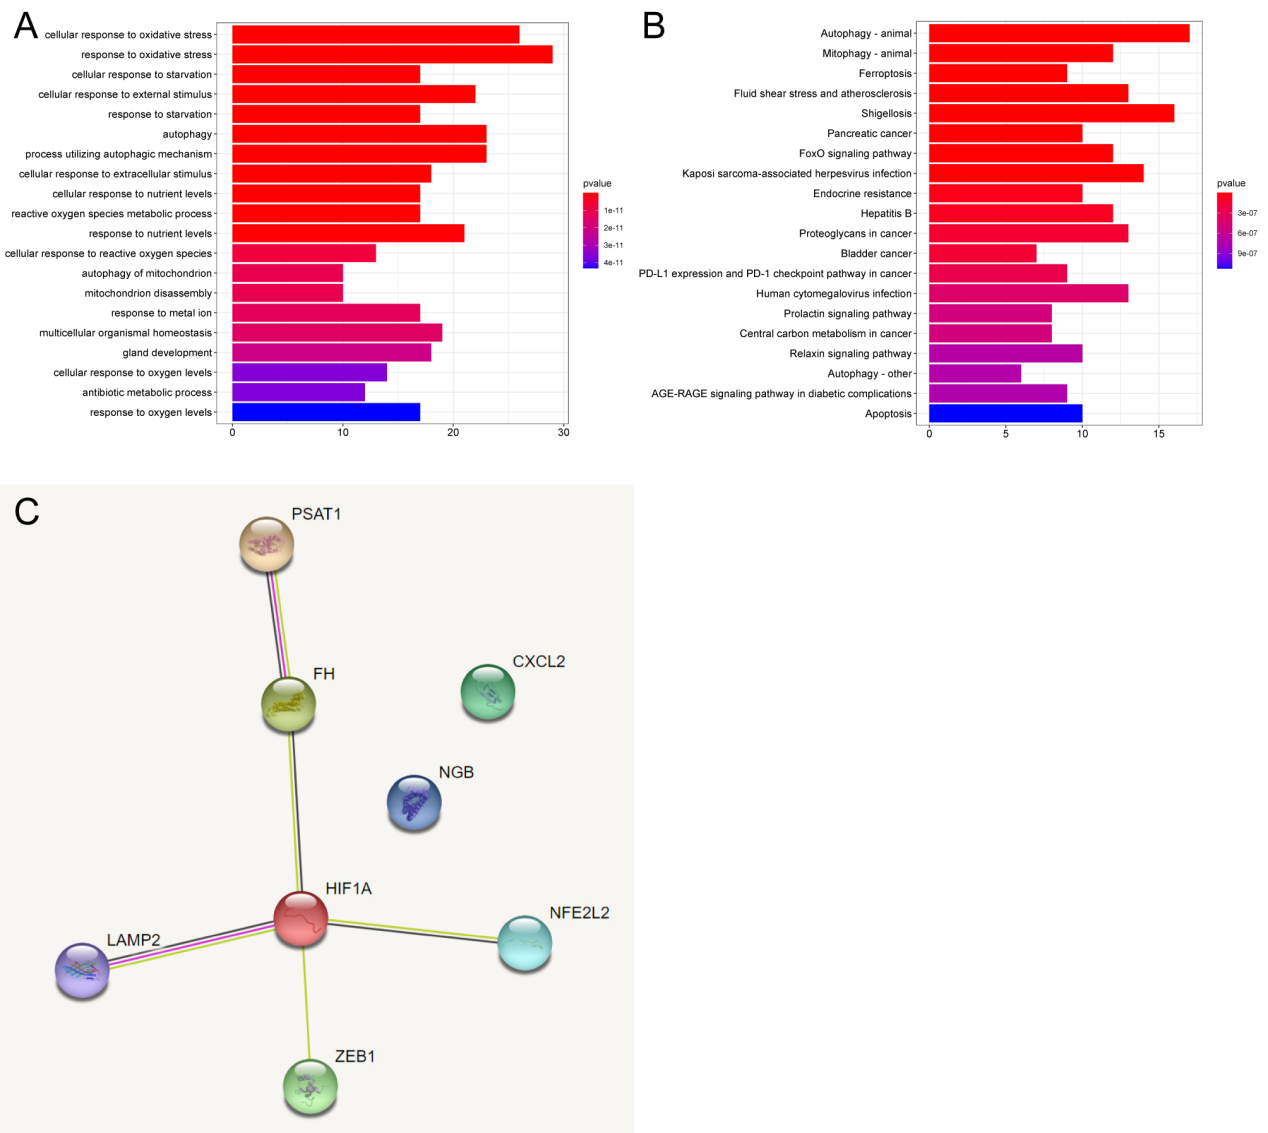
**

**Supplementary Figure2:** The expression levels of ZEB1 **(A)**, PSAT1 **(B)**, NGB **(C)**, NFE2L2 **(D)**, LAMP2 **(E)**, HIF1A **(F)**, FH **(G)**, and CXCL2 **(H)** were different between high-risk group and low-risk group by Wilcoxon rank-sum test.


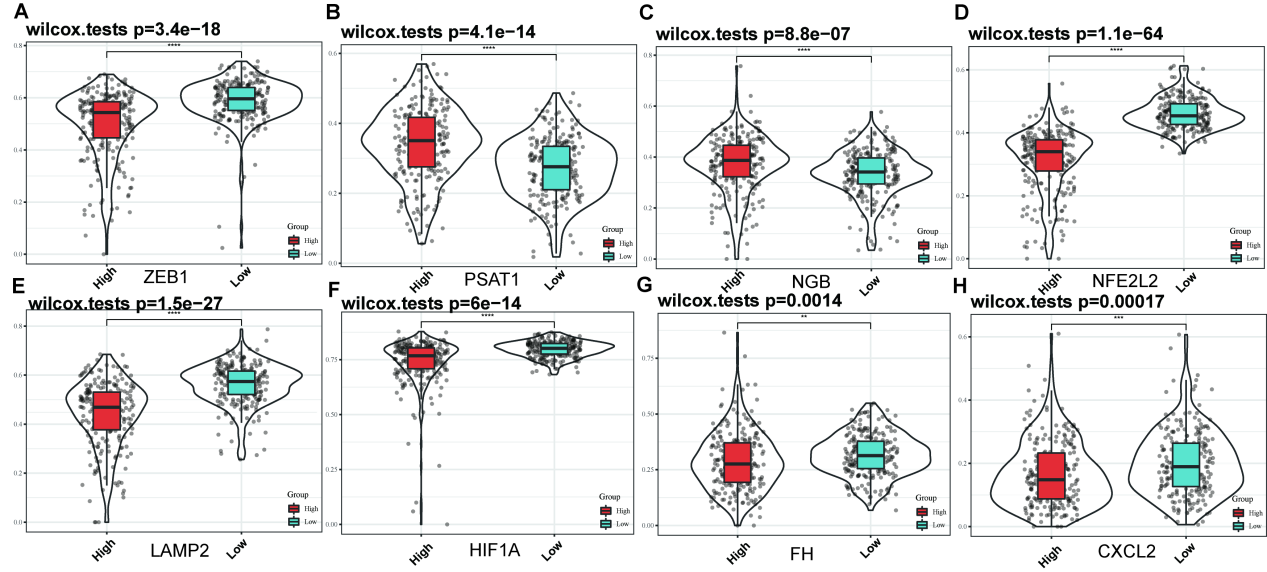


**Supplementary Table1:** 104 prognostic ferroptosis-associated genes.

| Terms | HR[exp(coef)] | coef | 95% CI lower | 95% CI upper | Z | P value |
| --- | --- | --- | --- | --- | --- | --- |
| NFE2L2 | 0.013216736 | -4.326271357 | -5.525765418 | -3.126777295 | -7.069093811 | 1.56E-12 |
| LAMP2 | 0.056754277 | -2.869024268 | -3.867758992 | -1.870289543 | -5.630308126 | 1.80E-08 |
| ZEB1 | 0.064327731 | -2.743764463 | -3.759036314 | -1.728492612 | -5.296787776 | 1.18E-07 |
| HIF1A | 0.091392896 | -2.392587529 | -3.320162224 | -1.465012834 | -5.055533975 | 4.29E-07 |
| SCP2 | 0.056165907 | -2.879445339 | -4.065866659 | -1.693024019 | -4.756833903 | 1.97E-06 |
| PSAT1 | 33.90305036 | 3.523504991 | 2.024169606 | 5.022840377 | 4.606002732 | 4.10E-06 |
| FTL | 3.25E-04 | -8.031224968 | -11.5166334 | -4.545816537 | -4.516231599 | 6.29E-06 |
| TMBIM4 | 0.019540418 | -3.935270258 | -5.65203255 | -2.218507966 | -4.492752439 | 7.03E-06 |
| KRAS | 0.060268357 | -2.808948076 | -4.063246091 | -1.554650061 | -4.389257574 | 1.14E-05 |
| CD44 | 0.145738498 | -1.925941372 | -2.807459735 | -1.044423008 | -4.282129427 | 1.85E-05 |
| TNFAIP3 | 0.118007056 | -2.137010859 | -3.116048241 | -1.157973477 | -4.278145448 | 1.88E-05 |
| LOC284561 | 20.71381628 | 3.030800931 | 1.595235054 | 4.466366808 | 4.137922728 | 3.50E-05 |
| ACVR1B | 32.26732994 | 3.474055261 | 1.824657576 | 5.123452947 | 4.128187673 | 3.66E-05 |
| NGB | 32.41651094 | 3.47866789 | 1.806174332 | 5.151161447 | 4.076585974 | 4.57E-05 |
| KLHL24 | 0.10492256 | -2.254532728 | -3.347326063 | -1.161739392 | -4.043585191 | 5.26E-05 |
| CXCL2 | 0.043025729 | -3.145956997 | -4.723851226 | -1.568062768 | -3.907715928 | 9.32E-05 |
| FH | 0.065089186 | -2.731996851 | -4.116202201 | -1.347791502 | -3.868367822 | 1.10E-04 |
| GPT2 | 28.58256208 | 3.352796814 | 1.64211715 | 5.063476478 | 3.841374362 | 1.22E-04 |
| MT3 | 20.333157 | 3.012252903 | 1.459102523 | 4.565403284 | 3.801246342 | 1.44E-04 |
| GPX2 | 9.940740779 | 2.296641543 | 1.074417213 | 3.518865872 | 3.682903867 | 2.31E-04 |
| LPIN1 | 0.105029465 | -2.25351435 | -3.455075059 | -1.05195364 | -3.675891637 | 2.37E-04 |
| PIK3CA | 0.15694175 | -1.85188056 | -2.875488247 | -0.828272874 | -3.545908506 | 3.91E-04 |
| PRKAA1 | 0.093510664 | -2.369679794 | -3.713350867 | -1.026008722 | -3.456565485 | 5.47E-04 |
| GCLC | 0.082469227 | -2.495330056 | -3.935607195 | -1.055052917 | -3.395705526 | 6.85E-04 |
| TGFBR1 | 0.12809484 | -2.054984353 | -3.258792533 | -0.851176173 | -3.345794943 | 8.20E-04 |
| STAT3 | 0.161652159 | -1.822308419 | -2.908780918 | -0.735835921 | -3.28739004 | 0.001011207 |
| EPAS1 | 0.170117226 | -1.771267517 | -2.832092288 | -0.710442746 | -3.272567378 | 0.001065755 |
| IDH1 | 0.156350615 | -1.855654261 | -2.981845853 | -0.729462668 | -3.229482038 | 0.001240147 |
| SOCS1 | 0.151574836 | -1.886675808 | -3.041206037 | -0.732145579 | -3.202875543 | 0.001360628 |
| FANCD2 | 9.19178733 | 2.218310404 | 0.855438402 | 3.581182406 | 3.190181097 | 0.001421837 |
| PHKG2 | 13.55271442 | 2.606586853 | 0.962098493 | 4.251075214 | 3.106629684 | 0.001892333 |
| MUC1 | 9.558206538 | 2.257400109 | 0.828033069 | 3.686767148 | 3.09537214 | 0.001965661 |
| CDKN2A | 6.02234014 | 1.795475911 | 0.637692532 | 2.953259291 | 3.03948751 | 0.00236981 |
| MAPK8 | 0.112520243 | -2.184622137 | -3.596037012 | -0.773207263 | -3.033679739 | 0.002415907 |
| MAP1LC3A | 14.67162708 | 2.685915498 | 0.93254672 | 4.439284276 | 3.002390432 | 0.002678684 |
| NOX3 | 15.74310125 | 2.756402254 | 0.952856495 | 4.559948012 | 2.995459981 | 0.002740313 |
| HNF4A | 12.41159917 | 2.518631452 | 0.868833839 | 4.168429065 | 2.992140913 | 0.002770284 |
| ATG7 | 0.216473007 | -1.530289419 | -2.548431425 | -0.512147413 | -2.945868188 | 0.003220496 |
| ELAVL1 | 0.167537494 | -1.78654811 | -2.990936891 | -0.582159329 | -2.907341887 | 0.003645146 |
| TF | 13.73549417 | 2.619983298 | 0.850475137 | 4.389491459 | 2.901977519 | 0.003708151 |
| IFNG | 0.178833158 | -1.721301986 | -2.887091083 | -0.55551289 | -2.893911009 | 0.00380476 |
| TUBE1 | 10.09709405 | 2.312247665 | 0.74293698 | 3.881558349 | 2.887842535 | 0.00387894 |
| ATF4 | 112.459993 | 4.722597541 | 1.465675444 | 7.979519638 | 2.841984185 | 0.004483372 |
| CBS | 8.855433258 | 2.181031198 | 0.675562162 | 3.686500234 | 2.839475602 | 0.004518775 |
| UBC | 0.136052957 | -1.994711079 | -3.38701397 | -0.602408188 | -2.8079823 | 0.004985297 |
| ATG5 | 0.126800575 | -2.0651397 | -3.506851725 | -0.623427674 | -2.807495091 | 0.004992844 |
| ATG16L1 | 0.134316066 | -2.007559552 | -3.42448009 | -0.590639014 | -2.776969006 | 0.005486841 |
| NF2 | 6.125588215 | 1.812474787 | 0.520831382 | 3.104118192 | 2.750283315 | 0.005954376 |
| PML | 0.203159265 | -1.593765051 | -2.731015883 | -0.456514218 | -2.746730985 | 0.006019248 |
| PRDX6 | 0.168424827 | -1.781265759 | -3.057239021 | -0.505292498 | -2.736120607 | 0.006216824 |
| IREB2 | 16.54242317 | 2.805928183 | 0.792864429 | 4.818991937 | 2.731914561 | 0.006296747 |
| SETD1B | 11.12890072 | 2.409545393 | 0.671367987 | 4.147722799 | 2.71699665 | 0.006587727 |
| MAPK1 | 0.150351032 | -1.894782508 | -3.27190549 | -0.517659527 | -2.69671302 | 0.007002759 |
| BID | 0.197279769 | -1.623132409 | -2.804750496 | -0.441514323 | -2.692309047 | 0.007095916 |
| MAPK14 | 0.22971755 | -1.470904769 | -2.555660105 | -0.386149432 | -2.657668761 | 0.007868319 |
| TP53 | 0.177070245 | -1.731208761 | -3.010028491 | -0.45238903 | -2.653311284 | 0.007970633 |
| SLC7A5 | 4.09381277 | 1.409476753 | 0.33707458 | 2.481878926 | 2.576014617 | 0.009994642 |
| EGFR | 4.403744879 | 1.482455288 | 0.346585157 | 2.618325418 | 2.558002798 | 0.010527525 |
| NOX1 | 8.933795042 | 2.189841281 | 0.500070485 | 3.879612077 | 2.539995397 | 0.011085393 |
| EIF2S1 | 0.156632651 | -1.853852018 | -3.285448059 | -0.422255976 | -2.538064567 | 0.011146742 |
| SQSTM1 | 0.188017974 | -1.671217712 | -2.962995325 | -0.379440099 | -2.535673705 | 0.011223125 |
| CHMP5 | 6.103994891 | 1.808943457 | 0.409586327 | 3.208300587 | 2.533637732 | 0.011288537 |
| ATG4D | 33.25743345 | 3.504278304 | 0.791604153 | 6.216952455 | 2.531914593 | 0.011344162 |
| CISD1 | 0.184897936 | -1.687951306 | -3.008516733 | -0.367385879 | -2.505232758 | 0.012237083 |
| TLR4 | 0.188503567 | -1.66863835 | -2.977935135 | -0.359341565 | -2.497883678 | 0.012493718 |
| CAV1 | 0.206051216 | -1.579630518 | -2.819422314 | -0.339838722 | -2.497208752 | 0.012517524 |
| AURKA | 5.331636244 | 1.673658179 | 0.325275907 | 3.02204045 | 2.432774312 | 0.014983637 |
| LPCAT3 | 5.100720846 | 1.629381872 | 0.313508296 | 2.945255449 | 2.426927513 | 0.015227298 |
| BNIP3 | 0.220613827 | -1.511341493 | -2.740081539 | -0.282601447 | -2.410741721 | 0.015920118 |
| ALB | 3.973063853 | 1.379537548 | 0.224126757 | 2.534948339 | 2.34015809 | 0.019275579 |
| GABARAPL1 | 5.01154157 | 1.611743566 | 0.255745896 | 2.967741237 | 2.329620037 | 0.019826242 |
| SRC | 7.784295412 | 2.052108295 | 0.308156203 | 3.796060387 | 2.306289473 | 0.021094463 |
| MAP3K5 | 0.2540932 | -1.37005415 | -2.537031359 | -0.203076941 | -2.30103619 | 0.021389586 |
| ACO1 | 0.242001663 | -1.418810682 | -2.633149364 | -0.204472 | -2.289985389 | 0.022022164 |
| MAFG | 5.135851078 | 1.63624557 | 0.216832774 | 3.055658367 | 2.259372605 | 0.023860217 |
| YY1AP1 | 0.319565906 | -1.140791748 | -2.136973982 | -0.144609513 | -2.244479635 | 0.024801558 |
| RRM2 | 7.157607534 | 1.968175782 | 0.235266412 | 3.701085152 | 2.2260562 | 0.026010417 |
| PGD | 0.191605788 | -1.652315204 | -3.108896952 | -0.195733455 | -2.223341253 | 0.026192798 |
| SP1 | 0.212198756 | -1.550231915 | -2.920528279 | -0.179935551 | -2.217329623 | 0.026600575 |
| STMN1 | 8.999477254 | 2.197166493 | 0.252673764 | 4.141659222 | 2.214648134 | 0.026784225 |
| CS | 0.094709961 | -2.3569361 | -4.446420063 | -0.267452137 | -2.210837676 | 0.02704708 |
| ANO6 | 0.19047318 | -1.658243881 | -3.130959809 | -0.185527952 | -2.206873858 | 0.027322873 |
| EIF2AK4 | 0.25573581 | -1.36361036 | -2.575907646 | -0.151313073 | -2.204597192 | 0.027482373 |
| MTDH | 0.297065714 | -1.213801905 | -2.295354426 | -0.132249385 | -2.199623202 | 0.02783364 |
| PRDX1 | 0.251764373 | -1.379261655 | -2.610823505 | -0.147699804 | -2.195020224 | 0.028162147 |
| CEBPG | 4.127744057 | 1.417731024 | 0.146880548 | 2.688581501 | 2.186489912 | 0.028779782 |
| AKR1C3 | 4.492806437 | 1.502477548 | 0.146457814 | 2.858497283 | 2.171651199 | 0.029881982 |
| NCOA4 | 0.217660768 | -1.52481754 | -2.91625279 | -0.13338229 | -2.147845157 | 0.031726058 |
| SLC1A4 | 0.294271475 | -1.223252553 | -2.347552361 | -0.098952744 | -2.13246585 | 0.032968569 |
| LONP1 | 4.760124898 | 1.560273907 | 0.116664049 | 3.003883766 | 2.118356733 | 0.034144867 |
| ASNS | 6.148190261 | 1.816157772 | 0.129382953 | 3.502932591 | 2.110301733 | 0.034832374 |
| CHAC1 | 4.812839233 | 1.571287187 | 0.092124063 | 3.050450311 | 2.082032905 | 0.037339464 |
| PEBP1 | 11.41244617 | 2.434704529 | 0.139474278 | 4.729934781 | 2.079065134 | 0.037611364 |
| CDO1 | 3.851889146 | 1.348563715 | 0.075619548 | 2.621507882 | 2.076396107 | 0.037857331 |
| LINC00472 | 0.219624027 | -1.515838165 | -2.957006887 | -0.074669442 | -2.061513106 | 0.039254114 |
| HSD17B11 | 0.308476628 | -1.176109198 | -2.300515389 | -0.051703007 | -2.050088028 | 0.040355841 |
| PLIN2 | 5.747831085 | 1.748822581 | 0.068884694 | 3.428760468 | 2.040330955 | 0.041317374 |
| ATM | 0.259166314 | -1.350285285 | -2.649117973 | -0.051452597 | -2.037606962 | 0.041589255 |
| ATG13 | 0.202348355 | -1.597764535 | -3.143436739 | -0.052092331 | -2.0260188 | 0.042762858 |
| CISD2 | 0.194142609 | -1.639162294 | -3.230725256 | -0.047599333 | -2.018581193 | 0.043530767 |
| CAPG | 0.286118397 | -1.251349577 | -2.483375517 | -0.019323637 | -1.990704922 | 0.046513337 |
| ZNF419 | 3.580719022 | 1.275563624 | 0.014684082 | 2.536443167 | 1.982789536 | 0.047390943 |
| ALOX15B | 0.307004815 | -1.180891847 | -2.35509399 | -0.006689705 | -1.971130358 | 0.048708967 |
| VEGFA | 0.254821491 | -1.367192013 | -2.730628251 | -0.003755776 | -1.965362979 | 0.049372241 |
